# Supplementary material for: Colossal photodetection enhancement via plasmon–exciton synergy in ultra-smooth CsPbBr 3 microplates
Source: Royal Society of Chemistry journal article supplement (doi:10.1039/d4tc02690j), 2024-01-01
Supplement: d4tc02690j1.pdf [file d4tc02690j1.pdf]

## Supporting Information

# Colossal Photodetection Enhancement via Plasmon-Exciton Synergy in Ultra-Smooth CsPbBr<sub>3</sub> Microplates

Zhaozhi Guan, Hua Mi,<sup>a</sup> Zairan Liu, Yan Tian, Haojian Lin, Huanjun Chen,\* Shaozhi Deng\* and Fei Liu\*<sup>c</sup>

---

*State Key Laboratory of Optoelectronic Materials and Technologies, Guangdong Province Key Laboratory of Display Material and Technology, and School of Electronics and Information Technology, Sun Yat-sen University, Guangzhou 510275, China*

*Corresponding Email: liufei@mail.sysu.edu.cn, chenhj8@mail.sysu.edu.cn, stdsz@mail.sysu.edu.cn*

## 1. The growth mechanism

The growth mechanism of our developed polydimethylsiloxane (PDMS)-assisted slow evaporation method should obey the classical theory of "Dissolution-Nucleation-Growth"<sup>1</sup> (Fig. R1). The growth process of the microplate can be depicted as follows. Firstly, the CsBr and PbBr<sub>2</sub> precursors will dissolve into polar organic solvents (DMF or DMSO). Secondly, the size of nucleus is dependent on the synergetic effect between the solute diffusion and surface reaction. When the stirring time is long enough over 24 hours, these two actions will arrive at the equilibrium, resulting in the formation of lots of CsPbBr<sub>3</sub> nuclei with uniform size based on the following reaction equation<sup>2</sup>:

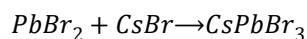

Finally, with the progression of the low-temperature (>70 °C) reaction, the nucleus gradually grows up and form monoclinic CsPbBr<sub>3</sub> microplates via the epitaxial growth on substrate<sup>3</sup>. Therefore, by controlling the solvent evaporation rate and the Van der Waals force between microplate and SiO<sub>2</sub> substrate, CsPbBr<sub>3</sub> microplates with atom-level smooth surface can be successfully fabricated in our work.

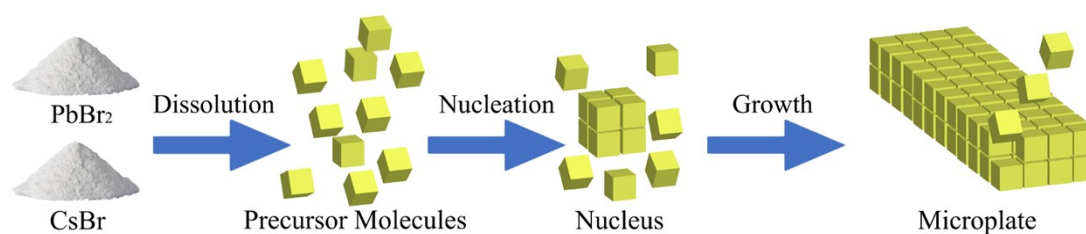

**Fig. S1** The formation mechanism of CsPbBr<sub>3</sub> microplates.

## 2. The key factor on the growth of CsPbBr<sub>3</sub> microplates

Among all the experimental parameters, the solvent evaporation rate is the key factor determining the surface roughness of perovskite microplates in PDMS-assisted slow evaporation method, which can regulate the solute concentration in the reaction process<sup>3</sup>.

Samples 1 and 2 respectively correspond to the growth substrate without any weights and with a PDMS film during the evaporation process. And Samples 3 and 4 have a top weight of 13 g or 18.1 g, respectively. Through modulating the mass of top weight, we can obtain different solvent evaporation rates (60, 15, 7.5 and 3.6  $\mu\text{L}/\text{h}$ ), as shown in Fig. R2(a-d). Because Sample 1 is too rough to conduct the AFM test, the morphology of Sample 1 is analyzed by SEM. It is obviously seen that the surface roughness of the CsPbBr<sub>3</sub> microplates will decrease from 17.88 nm to 0.714 nm when the mass of the weight increases 0 to 13 g, suggesting a slow and suitable evaporation rate will be beneficial for the formation of CsPbBr<sub>3</sub> microplates. By comparison, the optimal evaporation rate is about 7.5  $\mu\text{L}/\text{h}$  for the synthesis of CsPbBr<sub>3</sub> microplates with atom-level smooth surface.

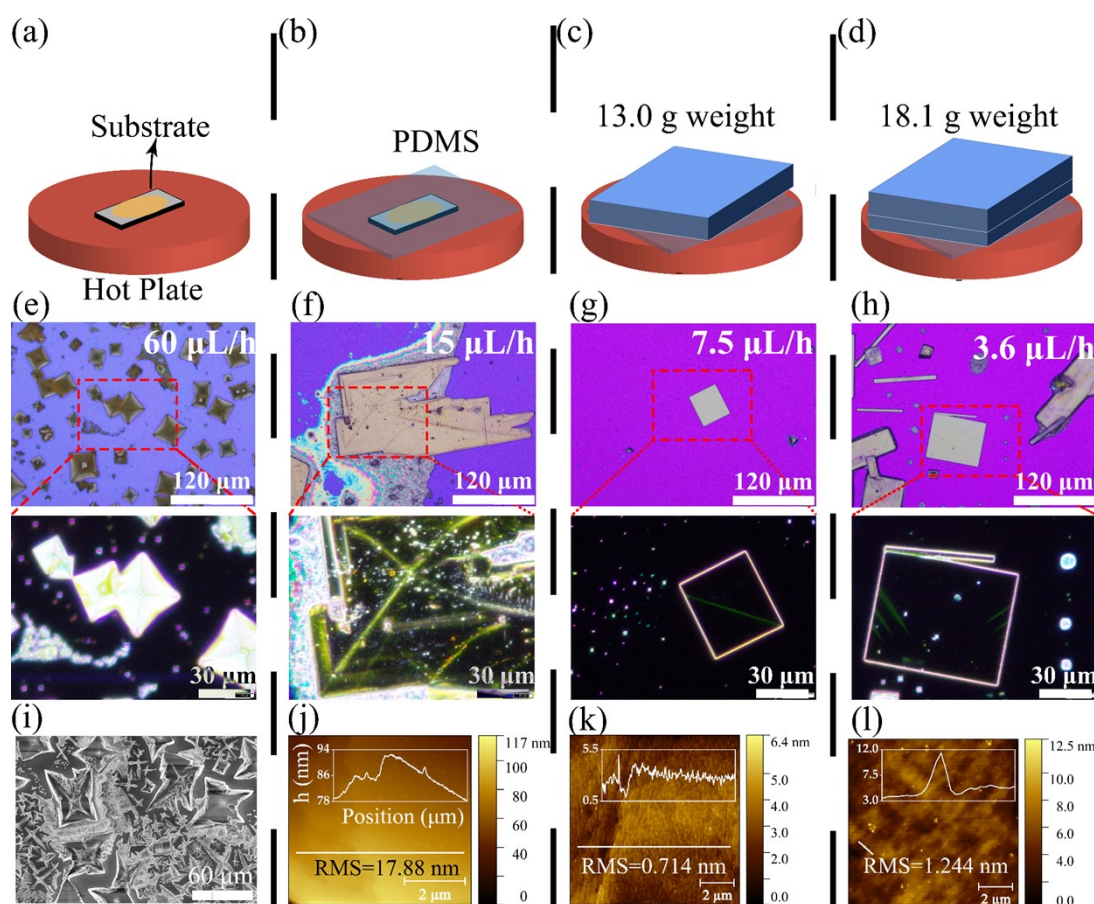

**Fig. S2** (a–d) Schematic illustration of the growth process with different evaporation rates of 60, 45, 7.5, and 3.6  $\mu\text{L}/\text{h}$ , respectively. (e–h) Optical images of the CsPbBr<sub>3</sub> samples with different evaporate rates. (i) The SEM image of Sample 1. (j–k) the corresponding AFM images of Samples 2–4.

### 3. Morphological characterization of Au nanospheres (Au NSs) with different diameters

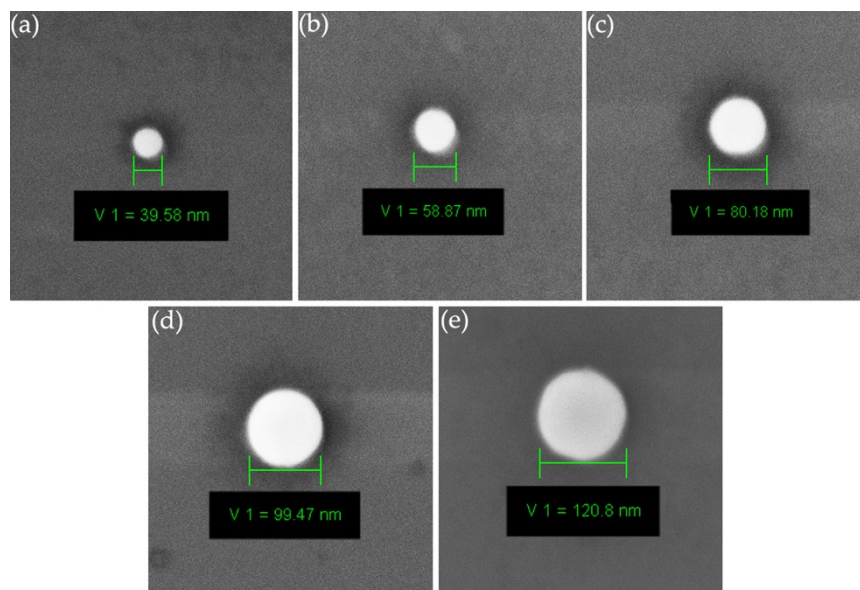

**Fig. S3** The scanning electron microscope (SEM) images of the Au NSs with different diameters.

To obtain the size distribution information, the SEM image of the dispersed Au NSs with a mean diameter of 60 nm on silica substrate are displayed in Fig. S4. By measuring the diameter of 87 Au NSs, the statistic diagram of the diameter of the Au NSs are shown in the inset. According to the size distribution diagram, the average diameter of the Au NSs can be deduced to be 59.87 nm, which is in good coincident with the average diameter of 60 nm.

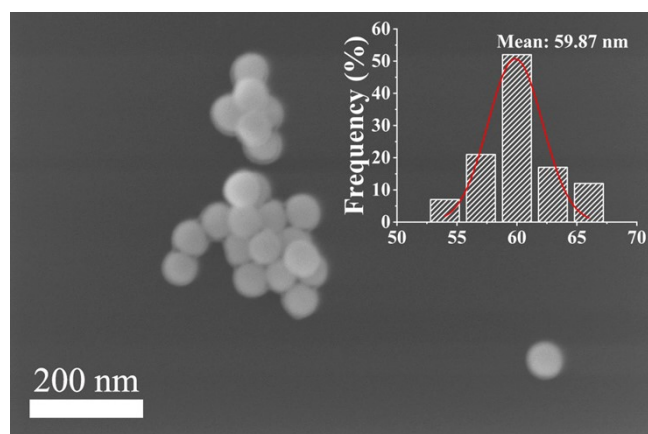

**Fig. S4** The SEM image of the Au NSs with a mean diameter of 60 nm on silica substrate. And the statistic diameter of the Au NS diameter is shown in the inset.

#### 4. Morphological characterization of CsPbBr<sub>3</sub> microplates

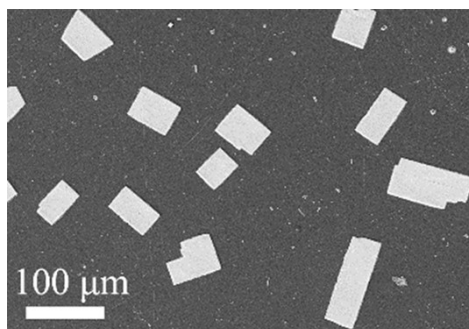

**Fig. S5** Typical SEM image of the CsPbBr<sub>3</sub> microplates grown on SiO<sub>2</sub> substrate.

## 5. Optical property characterizations of CsPbBr<sub>3</sub> microplates.

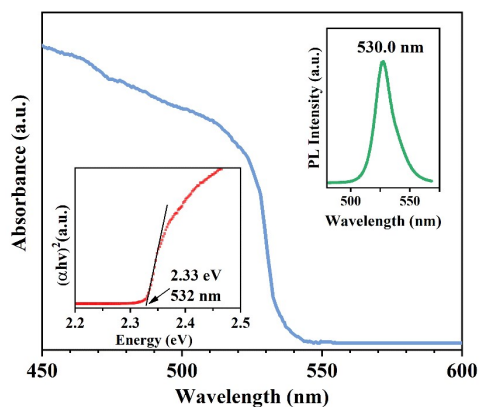

**Fig. S6** Representative absorption spectrum of the CsPbBr<sub>3</sub> microplates. And the top-right inset and the lower-left give PL spectrum and the Tauc plots of the CsPbBr<sub>3</sub> microplates, respectively.

## 6. Crystallographic characterization of CsPbBr<sub>3</sub> microplates

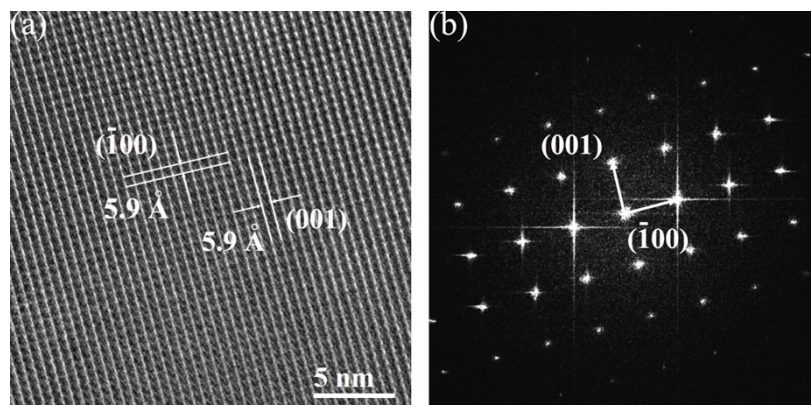

**Fig. S7** (a) Representative TEM image of the CsPbBr<sub>3</sub> microplate and (b) the corresponding Fast Fourier transform (FFT) pattern.

7. Typical I–V curves of the CsPbBr<sub>3</sub> photodetectors with and without 60-nm Au NS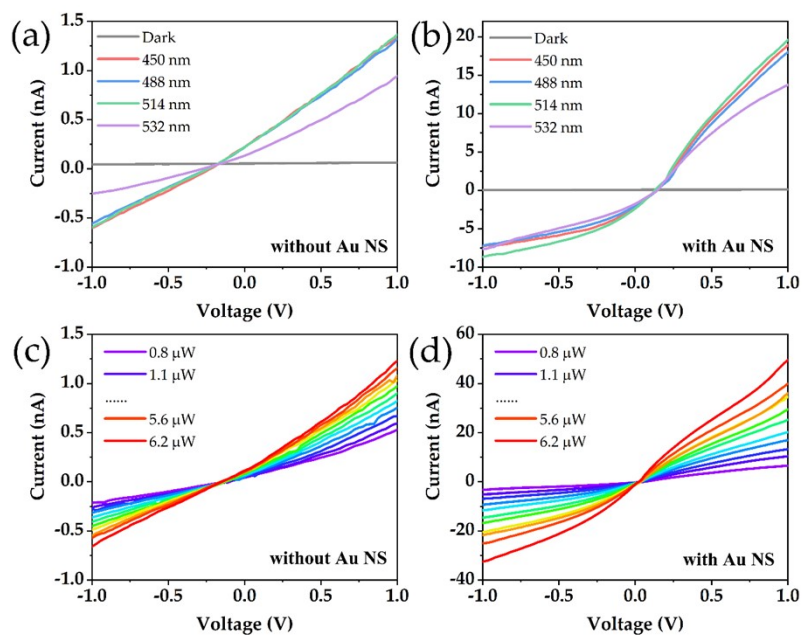

**Fig. S8** Photosensitive performances of the CsPbBr<sub>3</sub> microplate with or without 60-nm Au NS. (a, b) Typical photocurrent-voltage curves of the CsPbBr<sub>3</sub> PD without or with Au NS under different irradiations with a power density of 0.482 mW/cm<sup>2</sup>. (c, d) I-V curves of pristine CsPbBr<sub>3</sub> and Au/CsPbBr<sub>3</sub> hybrid structure under 514-nm irradiation, respectively.



## 8. The photosensitive behaviors of the 120-nm Au NS/CsPbBr<sub>3</sub> hybrid structure

To better comprehend the physical mechanism of the CsPbBr<sub>3</sub> PD with optical Au NSs (60 nm), Fig. S7(a) gives the typical I–V curves of the PDs with and without 120-nm Au NS under different illumination with the same power density of 0.482 mW/cm<sup>2</sup>. In Fig. S7(c), the photocurrent enhancement factor of the hybrid structure with 120-nm Au NS is only 84.4% under the same 514-nm irradiation ( $P = 0.482 \text{ mW/cm}^2$ ), which is far smaller than that (1145%) of the hybrid structure with 60-nm Au NS. According to Ruffino et al. report<sup>4</sup>, the surface work function of Au NS almost keeps unvaried with its diameter if the Au NS diameter is greater than 10 nm. Compared with 60 nm Au NS, the radiation recombination suppression of the Schottky junction in 120 nm Au NS/CsPbBr<sub>3</sub> hybrid structure should perform the same function, but both the resonance absorption and the plasmon resonance energy transfer (PRET) are weakened due to detuning with CsPbBr<sub>3</sub> excitons. It can be concluded that when the diameter of Au NS is 60 nm, the significant photocurrent enhancement factor should be mainly attributed to PRET effect.

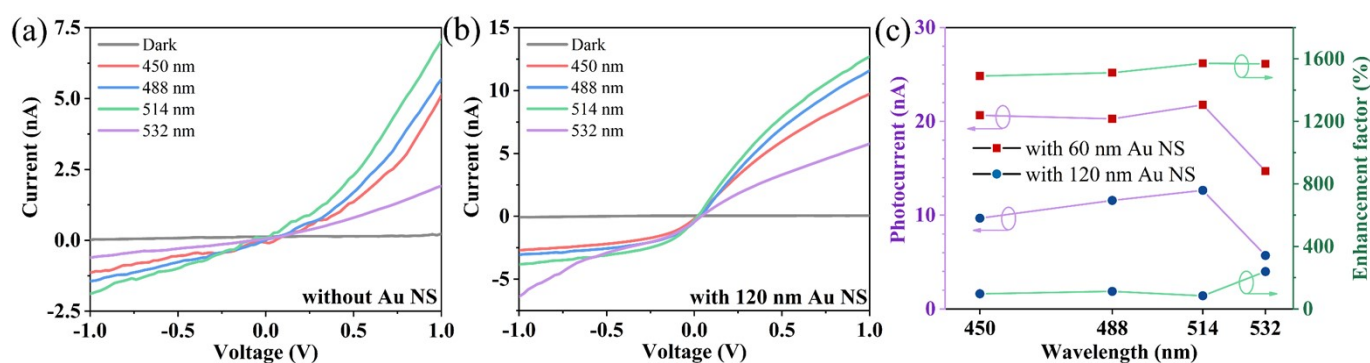

**Fig. S9** (a, b) Typical photocurrent-voltage curves of the CsPbBr<sub>3</sub> PD without or with 120 nm Au NS under different irradiations with a power density of 0.482 mW/cm<sup>2</sup>. (c) Photocurrent and the enhancement factor of CsPbBr<sub>3</sub> PDs as a function of the irradiation wavelengths at 1 V bias ( $P = 0.482 \text{ mW/cm}^2$ ) with 60 nm or 120 nm Au NS.

## Supplementary References:

- [1] M. Liao, M. Xia, Y. Xu, P. Lu and G. Niu, *Chem. Commun.*, 2023, **59**, 8758-8768.
- [2] C. Møller, *Mat Fys. Medd. Dan Vid Selsk.*, 1959, **32**.
- [3] C. Liu, Y. B. Cheng and Z. Ge, *Chem. Soc. Rev.*, 2020, **49**, 1653-1687.
- [4] F. Ruffino, M. G. Grimaldi, F. Giannazzo, F. Roccaforte and V. Raineri, *Appl. Phys. Lett.*, 2006, **89**, 243113.
